# Supplementary material for: Nationwide retrospective observational study of idiopathic dendriform pulmonary ossification: clinical features with a progressive phenotype
Source: PubMed Central journal article supplement — BMJ Open Respir Res. 2022 Sep 26;9(1):e001337. doi: 10.1136/bmjresp-2022-001337 (PMC9516172; doi:10.1136/bmjresp-2022-001337), 2022-09-26
Supplement: bmjresp-2022-001337supp001.pdf [file bmjresp-2022-001337supp001.pdf]

Supplementary Table 1. Survey form of idiopathic DPO

| Institution                                           | Department                     | Description                                                                                                        | Date of description                                                                |                                                                      |                      |
|-------------------------------------------------------|--------------------------------|--------------------------------------------------------------------------------------------------------------------|------------------------------------------------------------------------------------|----------------------------------------------------------------------|----------------------|
| Case No.                                              |                                |                                                                                                                    |                                                                                    |                                                                      |                      |
| Characteristics of patient                            | Sex                            | Male / Female                                                                                                      | Age at diagnosis : (years old)                                                     |                                                                      |                      |
|                                                       | Diagnostic opportunity         | Medical checkup / Examination for Respiratory symptoms / Accidentally while observing other diseases / other       |                                                                                    |                                                                      |                      |
|                                                       | Method of diagnosis            | Pathological / Only radiologically / Pathological anatomy / other                                                  |                                                                                    |                                                                      |                      |
|                                                       | Comorbidities                  | No / Yes                                                                                                           | If yes, disease names:                                                             |                                                                      |                      |
|                                                       | Past medical history           | No / Yes                                                                                                           | If yes, disease names:                                                             |                                                                      |                      |
|                                                       | Family history                 | No / Yes                                                                                                           | If yes, relatives:                                                                 |                                                                      |                      |
|                                                       | Smoking history                | No / Yes                                                                                                           | If yes, (packs / day) × (years)                                                    | Age when smoking cessation : (years old)                             |                      |
|                                                       | Occupation                     |                                                                                                                    |                                                                                    |                                                                      |                      |
| Data on diagnosis                                     | Symptoms                       | No / Yes                                                                                                           | If yes, symptoms :                                                                 |                                                                      |                      |
|                                                       | Physical findings              | Height (cm)                                                                                                        | Body weight(kg)                                                                    |                                                                      |                      |
|                                                       |                                | Blood pressure(mmHg systolic phase / diastolic phase)                                                              | Heart rate(bpm)                                                                    |                                                                      |                      |
|                                                       |                                | Respiratory rate(bpm)                                                                                              | SpO2(%)                                                                            | Oxygen : No / Yes                                                    |                      |
|                                                       |                                | Auscultatory findings of the lungs                                                                                 | Other special physical findings :                                                  |                                                                      |                      |
|                                                       | Blood test findings            | WBC(/μL)                                                                                                           | Leukocyte fraction                                                                 | Neu( )(%), Lym( )(%), Eos( )(%), Mon( )(%), Bas( )(%)                |                      |
|                                                       |                                | RBC(/μL)                                                                                                           | Hb(g/dL)                                                                           | Platelet(/μL)                                                        |                      |
|                                                       |                                | AST(U/L)                                                                                                           | ALT(U/L)                                                                           | LDH(U/L)                                                             |                      |
|                                                       |                                | ALP(U/L)                                                                                                           | T-Bil(mg/dL)                                                                       | CK(mg/dL)                                                            |                      |
|                                                       |                                | BUN(mg/dL)                                                                                                         | Cre(mg/dL)                                                                         | CRP(mg/dL)                                                           |                      |
|                                                       |                                | albumin(mg/dL)                                                                                                     | Ca(mg/dL)                                                                          | P(mg/dL)                                                             |                      |
|                                                       |                                | intact PTH(pg/mL)                                                                                                  | Calcitonin(pg/mL)                                                                  | 25-OH vitaminD(ng/mL)                                                |                      |
|                                                       |                                | HbA1c(NGSP) (%)                                                                                                    | BNP(pg/mL)                                                                         | KL-6(U/L)                                                            |                      |
|                                                       |                                | TSH(μIU/mL)                                                                                                        | free T4(ng/dL)                                                                     | free T3(ng/mL)                                                       |                      |
|                                                       |                                | ACE (mU/mL)                                                                                                        |                                                                                    |                                                                      |                      |
|                                                       |                                | Positive autoimmune antibody and its value                                                                         |                                                                                    |                                                                      |                      |
|                                                       |                                | Uric findings                                                                                                      | Urine occult blood                                                                 | Urine protein                                                        | Urine sediment :     |
|                                                       |                                |                                                                                                                    | Urin Cre(mg/dL)                                                                    |                                                                      | Urine protein(mg/dL) |
|                                                       | Arterial blood gas analysis    | Room air or oxygen [ (L/min)]                                                                                      | pH ( )                                                                             | PaO2 ( ) PaCO2 ( ) HCO3-( ) BE ( )                                   |                      |
|                                                       | Pulmonary function test        | VC ( ) (L) %VC ( ) (%) FVC ( ) (L) %FVC ( ) (%) FEV1.0 ( ) (L) %FEV1( ) (%) FEV1.0% ( ) (%) TLC ( ) (L) RV ( ) (L) | DLCO ( ) (mL/min/mmHg) %DLCO( ) (%) DLCO/VA( ) (mL/min/mmHg/L) %DLCO/VA( ) (%)     |                                                                      |                      |
|                                                       |                                | Electro-cardiogram                                                                                                 | Normal / Abnormal                                                                  | Findings :                                                           |                      |
|                                                       | Echocardiographic findings     | Normal / Abnormal                                                                                                  | Findings :                                                                         |                                                                      |                      |
|                                                       | Chest plain x-ray              | Date :                                                                                                             | * CD-ROM                                                                           |                                                                      |                      |
|                                                       | Chest simple CT                | Date :                                                                                                             | * CD-ROM                                                                           |                                                                      |                      |
|                                                       | Transbronchial lung biopsy     | No / Yes                                                                                                           |                                                                                    |                                                                      |                      |
|                                                       | Bronchoalveolar lavage         | No / Yes                                                                                                           | BALF : Site of BAL ( ) In ( ) mL, collection ( ) mL                                | CD4/8 ratio :                                                        |                      |
|                                                       |                                |                                                                                                                    | Fraction macrophage ( ) (%) Lym( ) (%) Neu( ) (%) Eos( ) (%) Mon( ) (%) Bas( ) (%) |                                                                      |                      |
| Surgical lung biopsy                                  | No / Yes                       |                                                                                                                    |                                                                                    |                                                                      |                      |
| Pathological anatomy                                  | No / Yes                       |                                                                                                                    |                                                                                    |                                                                      |                      |
| Latest data                                           | Recent confirmation date :     | Age : (years old)                                                                                                  | SpO2(%) (%) Oxygen : No / Yes                                                      |                                                                      |                      |
|                                                       | Arterial blood gas analysis    | Room air or oxygen [ (L/min)]                                                                                      | pH ( ) PaO2 ( ) PaCO2 ( ) HCO3-( ) BE ( )                                          |                                                                      |                      |
|                                                       | Drug therapy                   | No / Yes                                                                                                           | If yes, drugs :                                                                    |                                                                      |                      |
|                                                       | Oxygen therapy                 | No / Yes                                                                                                           | If yes, date of starting oxygen :                                                  | Age of starting oxygen : (years old)                                 |                      |
|                                                       | Latest chest plain x-ray       | Date :                                                                                                             | * CD-ROM                                                                           |                                                                      |                      |
|                                                       | Latest chest simple CT         | Date :                                                                                                             | * CD-ROM                                                                           |                                                                      |                      |
|                                                       | Latest pulmonary function test | VC ( ) (L) %VC ( ) (%) FVC ( ) (L) %FVC ( ) (%) FEV1.0 ( ) (L) %FEV1( ) (%) FEV1.0% ( ) (%) TLC ( ) (L) RV ( ) (L) | DLCO ( ) (mL/min/mmHg) %DLCO( ) (%) DLCO/VA( ) (mL/min/mmHg/L) %DLCO/VA( ) (%)     |                                                                      |                      |
|                                                       |                                | Survival                                                                                                           | Alive / Dead/ Unknow                                                               | If dead, date of death : Age at death : (years old) Cause of death : |                      |
| Please write briefly clinical course after diagnosis. |                                |                                                                                                                    |                                                                                    |                                                                      |                      |

Supplementary Table 2. The score sheet of radiological findings of HRCT of IDPO patients

| Case No. | Distribution                                                                                   |                                                                                                  | Radiological findings                             |                       |                                |              |             |                      |                                |                                      |                                    |                           |                                     |      |                          |               | Degree of progress                                              |
|----------|------------------------------------------------------------------------------------------------|--------------------------------------------------------------------------------------------------|---------------------------------------------------|-----------------------|--------------------------------|--------------|-------------|----------------------|--------------------------------|--------------------------------------|------------------------------------|---------------------------|-------------------------------------|------|--------------------------|---------------|-----------------------------------------------------------------|
|          | Craniocaudal                                                                                   | Axial                                                                                            | 0: none, 1: < 10%, 2: 10-30%, 3: 30-50%, 4: > 50% |                       |                                |              |             |                      |                                |                                      |                                    |                           |                                     |      |                          |               |                                                                 |
|          | 1: Upper and middle fields predominance<br>2: Lower fields predominance<br>3: Diffuse / Random | 1: Peripheral<br>2: Peribronchovascular<br>3: Diffuse<br>4: Random<br>5: Dependent<br>6: Central | Fine calcified nodules                            | Calcified short lines | Calcified branching structures | Fine nodules | Short lines | Branching structures | Interlobular Septal thickening | Thickening of bronchovascular budles | Pleural thickening or irregularity | Non-septal linear opacity | Subpleural curve-linear shadow/line | cyst | Ground-glass attenuation | Consolidation | 0: Incomparable<br>1: Stable<br>2: Mild progress<br>3: Progress |
| 1        | 2                                                                                              | 2 3                                                                                              | 2                                                 | 1                     | 2                              | 1            | 1           | 1                    | 1                              | 1                                    | 1                                  | 0                         | 0                                   | 0    | 0                        | 0             | 3                                                               |
| 2        | 2                                                                                              | 3                                                                                                | 1                                                 | 1                     | 2                              | 1            | 1           | 1                    | 1                              | 0                                    | 0                                  | 0                         | 0                                   | 0    | 0                        | 0             | 0                                                               |
| 3        | 2                                                                                              | 3                                                                                                | 1                                                 | 1                     | 1                              | 1            | 1           | 1                    | 0                              | 0                                    | 1                                  | 0                         | 0                                   | 0    | 0                        | 0             | 0                                                               |
| 4        | 3                                                                                              | 3                                                                                                | 2                                                 | 1                     | 2                              | 1            | 1           | 1                    | 1                              | 0                                    | 1                                  | 0                         | 0                                   | 1    | 0                        | 0             | 3                                                               |
| 6        | 2                                                                                              | 3                                                                                                | 2                                                 | 1                     | 2                              | 1            | 1           | 1                    | 1                              | 0                                    | 1                                  | 0                         | 0                                   | 1    | 0                        | 0             | 3                                                               |
| 8        | 2                                                                                              | 3                                                                                                | 2                                                 | 1                     | 2                              | 1            | 1           | 1                    | 1                              | 0                                    | 0                                  | 0                         | 0                                   | 0    | 0                        | 0             | 0                                                               |
| 10       | 3                                                                                              | 3                                                                                                | 1                                                 | 1                     | 1                              | 2            | 1           | 2                    | 0                              | 0                                    | 0                                  | 1                         | 0                                   | 0    | 0                        | 0             | 3                                                               |
| 11       | 2                                                                                              | 3                                                                                                | 2                                                 | 1                     | 1                              | 1            | 1           | 1                    | 1                              | 0                                    | 0                                  | 1                         | 0                                   | 0    | 0                        | 0             | 3                                                               |
| 14       | 2                                                                                              | 2 3                                                                                              | 1                                                 | 1                     | 2                              | 1            | 1           | 1                    | 1                              | 1                                    | 1                                  | 0                         | 0                                   | 0    | 0                        | 0             | 3                                                               |
| 15       | 2                                                                                              | 2 3                                                                                              | 1                                                 | 1                     | 2                              | 1            | 1           | 1                    | 1                              | 0                                    | 1                                  | 0                         | 0                                   | 0    | 0                        | 0             | 0                                                               |
| 16       | 2                                                                                              | 2 3                                                                                              | 2                                                 | 1                     | 1                              | 1            | 1           | 1                    | 1                              | 0                                    | 0                                  | 1                         | 0                                   | 0    | 0                        | 0             | 3                                                               |
| 19       | 3                                                                                              | 3                                                                                                | 2                                                 | 1                     | 2                              | 1            | 1           | 1                    | 1                              | 0                                    | 1                                  | 0                         | 0                                   | 0    | 0                        | 0             | 3                                                               |
| 20       | 2                                                                                              | 3                                                                                                | 1                                                 | 1                     | 1                              | 1            | 1           | 1                    | 1                              | 0                                    | 0                                  | 0                         | 0                                   | 0    | 0                        | 0             | 1                                                               |
| 21       | 2                                                                                              | 2                                                                                                | 1                                                 | 1                     | 1                              | 1            | 1           | 1                    | 0                              | 0                                    | 0                                  | 0                         | 0                                   | 0    | 0                        | 0             | 3                                                               |
| 25       | 2                                                                                              | 3                                                                                                | 2                                                 | 1                     | 2                              | 1            | 1           | 1                    | 1                              | 0                                    | 1                                  | 1                         | 0                                   | 0    | 0                        | 0             | 3                                                               |
| 28       | 2                                                                                              | 3                                                                                                | 2                                                 | 1                     | 2                              | 1            | 1           | 1                    | 1                              | 1                                    | 1                                  | 1                         | 0                                   | 0    | 0                        | 0             | 3                                                               |
| 29       | 2                                                                                              | 3                                                                                                | 2                                                 | 1                     | 2                              | 1            | 1           | 1                    | 1                              | 1                                    | 1                                  | 1                         | 0                                   | 0    | 0                        | 0             | 3                                                               |
| 30       | 2                                                                                              | 3                                                                                                | 2                                                 | 1                     | 2                              | 1            | 1           | 1                    | 1                              | 1                                    | 1                                  | 1                         | 0                                   | 1    | 0                        | 0             | 3                                                               |
| 33       | 2                                                                                              | 3                                                                                                | 1                                                 | 1                     | 1                              | 2            | 1           | 1                    | 1                              | 1                                    | 1                                  | 1                         | 0                                   | 0    | 0                        | 0             | 3                                                               |
| 34       | 2                                                                                              | 2                                                                                                | 1                                                 | 1                     | 1                              | 1            | 1           | 1                    | 1                              | 1                                    | 1                                  | 0                         | 0                                   | 0    | 1                        | 0             | 0                                                               |
| 35       | 2                                                                                              | 1                                                                                                | 2                                                 | 1                     | 1                              | 1            | 1           | 1                    | 0                              | 0                                    | 0                                  | 0                         | 0                                   | 0    | 0                        | 0             | 3                                                               |
| 37       | 3                                                                                              | 3 4                                                                                              | 1                                                 | 1                     | 1                              | 2            | 0           | 1                    | 1                              | 0                                    | 0                                  | 1                         | 0                                   | 0    | 0                        | 0             | 1                                                               |

Supplementary Table 3. The score sheet of pathological findings of IDPO

| Case No. | Types of ossified lesion<br>1: Dendriform<br>2: Nodular<br>3: Mixed | Distribution of ossified lesion<br>1: Peribronchial<br>2: Perivascular<br>3: Subpleural<br>4: Interlobular<br>5: Intraalveolar | Maximum size of ossified lesion (mm) | Number of ossified lesions | Bone marrow<br>1: Exist<br>2: Few | Grade of pathological findings  |                     |                                |           |                                   |                                              |
|----------|---------------------------------------------------------------------|--------------------------------------------------------------------------------------------------------------------------------|--------------------------------------|----------------------------|-----------------------------------|---------------------------------|---------------------|--------------------------------|-----------|-----------------------------------|----------------------------------------------|
|          |                                                                     |                                                                                                                                |                                      |                            |                                   | Fibrosis around ossified lesion | Subpleural fibrosis | Inflammatory cell infiltration | Emphysema | Histiocyte containing hemosiderin | Histiocyte containing brown pigment granules |
| 1        | 1                                                                   | 1, 2, 3, 5                                                                                                                     | 2.0                                  | 6                          | 1                                 | 1                               | 0-1+                | 1+                             | 0+        | 0+                                | 1+                                           |
| 2        | 3                                                                   | 1, 2, 3, 4                                                                                                                     | 3.0                                  | 32                         | 1                                 | 1                               | 0-1+                | 1+                             | 0+        | 0+                                | 1+                                           |
| 3        | 3                                                                   | 1, 2, 3                                                                                                                        | 3.0                                  | 15                         | 1                                 | 1                               | 0-1+                | 1+                             | 0+        | 0+                                | 0+                                           |
| 4        | 1                                                                   | 3, 4                                                                                                                           | 3.0                                  | 3                          | 1                                 | 1                               | 0-1+                | 1+                             | 0+        | 2+                                | 2+                                           |
| 6        | 3                                                                   | 1, 2, 3, 4                                                                                                                     | 5.0                                  | 15                         | 1                                 | 1                               | 1+                  | 1+                             | 0+        | 1+                                | 1+                                           |
| 8        | 1                                                                   | 1, 2, 3, 4                                                                                                                     | 1.0                                  | 7                          | 1                                 | 1                               | 0+                  | 0-1+                           | 1+        | 1+                                | 1+                                           |
| 10       | 1                                                                   | 1, 2, 3, 5                                                                                                                     | 6.0                                  | 15                         | 1                                 | 1                               | 1+                  | 1+                             | 1+        | 0+                                | 1+                                           |
| 11       | 1                                                                   | 1, 2, 3, 4                                                                                                                     | 3.0                                  | 6.75                       | 1                                 | 1                               | 0-1+                | 1+                             | 0+        | 1+                                | 2+                                           |
| 14       | 1                                                                   | 1, 2, 3, 4, 5                                                                                                                  | 6.0                                  | 17                         | 1                                 | 1                               | 1+                  | 1+                             | 0+        | 0+                                | 1+                                           |
| 15       | 1                                                                   | 1, 2, 3                                                                                                                        | N.E.                                 | 5                          | 1                                 | 0                               | 0+                  | 1+                             | N.E.      | N.E.                              | N.E.                                         |
| 16       | 1                                                                   | 3, 5                                                                                                                           | N.E.                                 | 3                          | 1                                 | 1                               | 0+                  | 1+                             | N.E.      | N.E.                              | N.E.                                         |
| 19       | 1                                                                   | 1, 2, 5                                                                                                                        | N.E.                                 | 10                         | 1                                 | 1                               | 0+                  | N.E.                           | N.E.      | N.E.                              | N.E.                                         |
| 20       | 1                                                                   | 1, 2, 3, 5                                                                                                                     | 4.0                                  | 55                         | 1                                 | 1                               | 0+                  | 1+                             | 0+        | 0+                                | 0-1+                                         |
| 21       | 3                                                                   | 2, 5                                                                                                                           | 1.0                                  | 6                          | 2                                 | 1                               | 0                   | 0+                             | 0+        | 0+                                | 1+                                           |
| 25       | 1                                                                   | 1, 3, 4, 5                                                                                                                     | 3.0                                  | 9.5                        | 1                                 | 1                               | 1+                  | 1+                             | 0+        | N.E.                              | 1-2+                                         |
| 28       | 3                                                                   | 3, 5                                                                                                                           | 5.0                                  | 7                          | 1                                 | 1                               | 1+                  | 1+                             | 0+        | 0+                                | 1+                                           |
| 29       | 1                                                                   | 1, 3, 5                                                                                                                        | 5.0                                  | 4                          | 1                                 | 1                               | 0-1+                | 1+                             | 0+        | 2+                                | 2+                                           |
| 30       | 1                                                                   | 2                                                                                                                              | 3.0                                  | 2                          | 1                                 | 1                               | 0-1+                | 1+                             | 0+        | 2+                                | 0-1+                                         |
| 33       | 1                                                                   | 1, 3, 4, 5                                                                                                                     | 1.0                                  | 5                          | 1                                 | 1                               | 0-1+                | 1+                             | 0+        | 0+                                | 1+                                           |
| 34       | 1                                                                   | 1, 3, 5                                                                                                                        | 1.0                                  | 5                          | 1                                 | 1                               | N.E.                | N.E.                           | N.E.      | N.E.                              | N.E.                                         |
| 35       | 1                                                                   | 1, 3                                                                                                                           | 2.0                                  | 25                         | 1                                 | 2                               | 0-1+                | 1+                             | N.E.      | N.E.                              | 1+                                           |
| 37       | 1                                                                   | 1, 3, 5                                                                                                                        | 2.5                                  | 23                         | 1                                 | 1                               | N.E.                | 1+                             | N.E.      | 1+                                | 1+                                           |

N.E. not evaluable

**Supplementary Table 4. The data of pulmonary function tests at the diagnosis and latest follow-up**

|                                                        | Initial value at diagnosis |             | Latest value |             | Change/year |                |
|--------------------------------------------------------|----------------------------|-------------|--------------|-------------|-------------|----------------|
|                                                        | n                          | Mean (SD)   | n            | Mean (SD)   | n           | Mean (SD)      |
| FVC (mL)                                               | 22                         | 3379 (724)  | 17           | 3143 (774)  | 17          | -114.5 (192.2) |
| FVC, %predicted (%)                                    | 22                         | 85.0 (17.0) | 17           | 77.0 (16.8) | 17          | -3.1 (5.1)*    |
| FEV <sub>1</sub> (mL)                                  | 22                         | 2729 (626)  | 17           | 2490 (595)  | 17          | -97.3 (98.5)   |
| FEV <sub>1</sub> , %predicted (%)                      | 22                         | 80.0 (17.5) | 17           | 71.8 (13.8) | 17          | -2.7 (3.9)*    |
| FEV <sub>1</sub> /FVC (%)                              | 22                         | 80.5 (7.2)  | 17           | 78.3 (9.1)  | 17          | -0.2 (3.6)     |
| DL <sub>CO</sub> , %predicted (%)                      | 16                         | 74.9 (17.7) | 11           | 68.5 (12.4) | 11          | -1.3 (1.5)*    |
| Observation period of pulmonary function tests (years) |                            |             | 6.78 (4.84)  |             |             |                |
| FVC, %predicted < 80%                                  | 8 (36.3%)                  |             | 9 (52.9%)    |             |             |                |
| FEV <sub>1</sub> /FVC (%) < 70%                        | 2 (9.1%)                   |             | 2 (11.8%)    |             |             |                |
| DL <sub>CO</sub> , %predicted (%) < 80%                | 10 (62.5%)                 |             | 9 (81.8%)    |             |             |                |

Data are mean (SD) or n (%)

\*Relative change

**Supplementary Table 5. Comparison between stable and progressive groups of IDPO in the decline of FVC.**

|                                                        | Decline of FVC     |                     | P value |
|--------------------------------------------------------|--------------------|---------------------|---------|
|                                                        | < 50 mL/year (n=7) | ≥ 50 mL/year (n=10) |         |
| Mean age at diagnosis of DPO (years)                   | 34.0 (8.8)         | 35.3 (6.8)          | 0.749*  |
| Sex male                                               | 6 (86%)            | 9 (90%)             | 1**     |
| Pulmonary function test on diagnosis                   |                    |                     |         |
| FVC (mL)                                               | 3576 (838)         | 3507 (610)          | 0.857*  |
| FVC, %predicted (%)                                    | 97.8 (17.9)        | 84.8 (10.8)         | 0.697*  |
| FEV <sub>1</sub> (mL)                                  | 3000 (675)         | 2775 (574)          | 0.481*  |
| FEV <sub>1</sub> , %predicted (%)                      | 80.5 (15.6)        | 79.9 (9.6)          | 0.604*  |
| Median ossification score of HRCT                      | 4.0                | 4.5                 | 0.916^  |
| Number of ossification lesion of pathological specimen | 11.7 (7.5)         | 8.0 (6.6)           | 0.308*  |
| PaO <sub>2</sub> (mmHg) #                              | 92.8 (23.8)        | 85.6 (4.3)          | 0.54*   |
| WBC (cells/μL)                                         | 7050 (2841)        | 6556 (2524)         | 0.718*  |
| LDH (U/mL)                                             | 176.3 (41.5)       | 185.4 (27.9)        | 0.624*  |
| KL-6 (U/mL) #                                          | 227.4 (96.2)       | 479.4 (285.7)       | 0.0466* |

Data are mean(SD) or n of 17 IDPO cases (%).

\*Welch Two Sample t-test

\*\*Fisher test

^Mann-Whitney U test

# n=18

**A. Craniocaudal distribution of ossified lesions**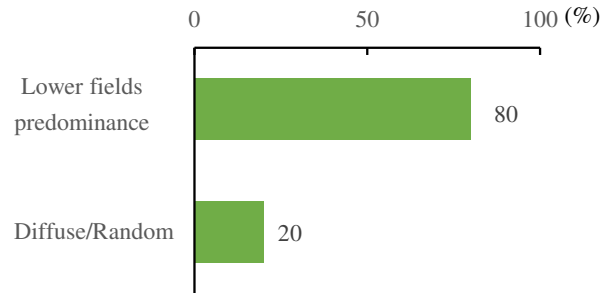**B. Axial distribution of ossified lesions**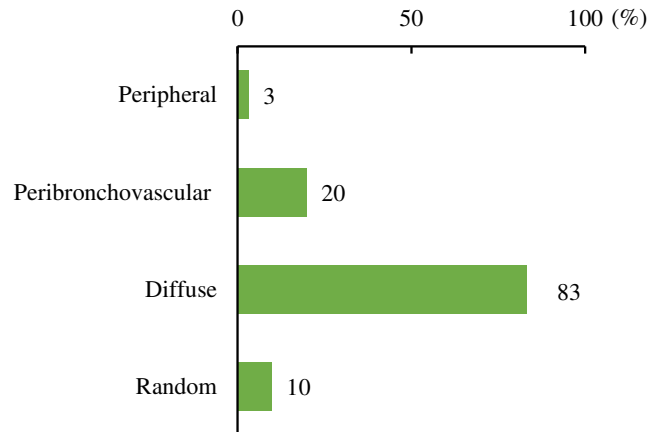**C. Other radiological findings**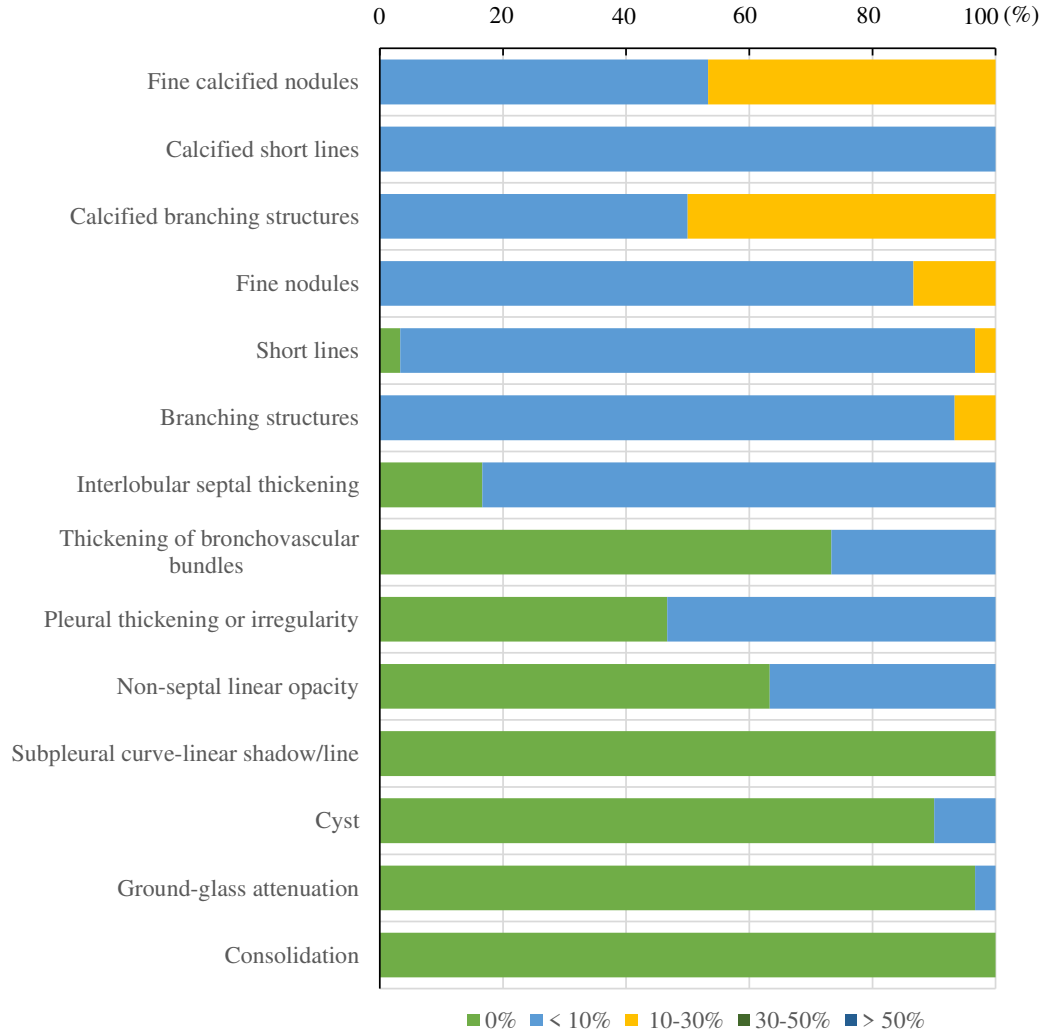**Supplementary Figure 1. Features of radiological IDPO in HRCT**

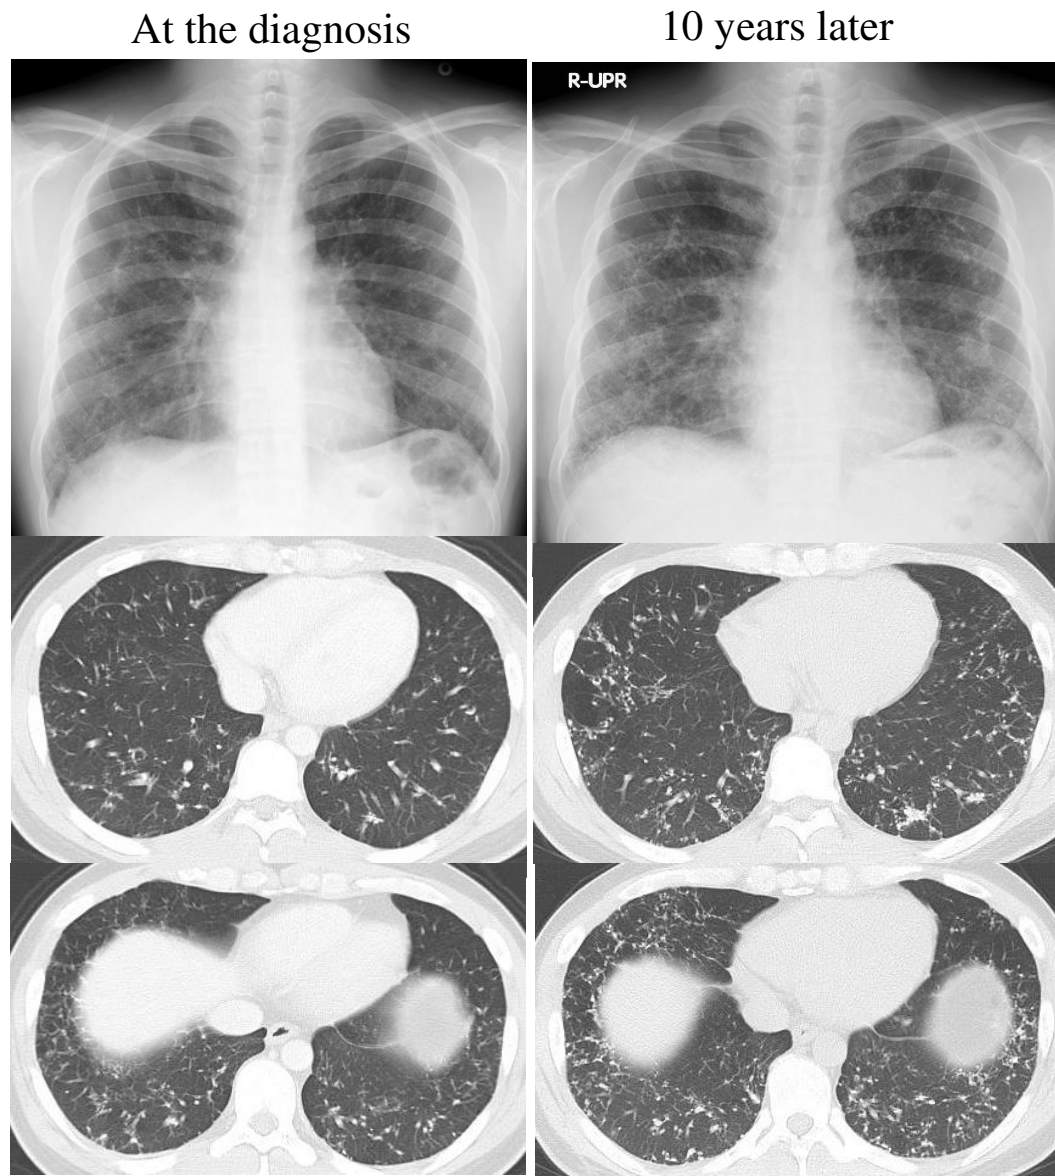

**Supplementary Figure 2. The representative case showing deterioration of the radiological findings on chest radiography and HRCT**

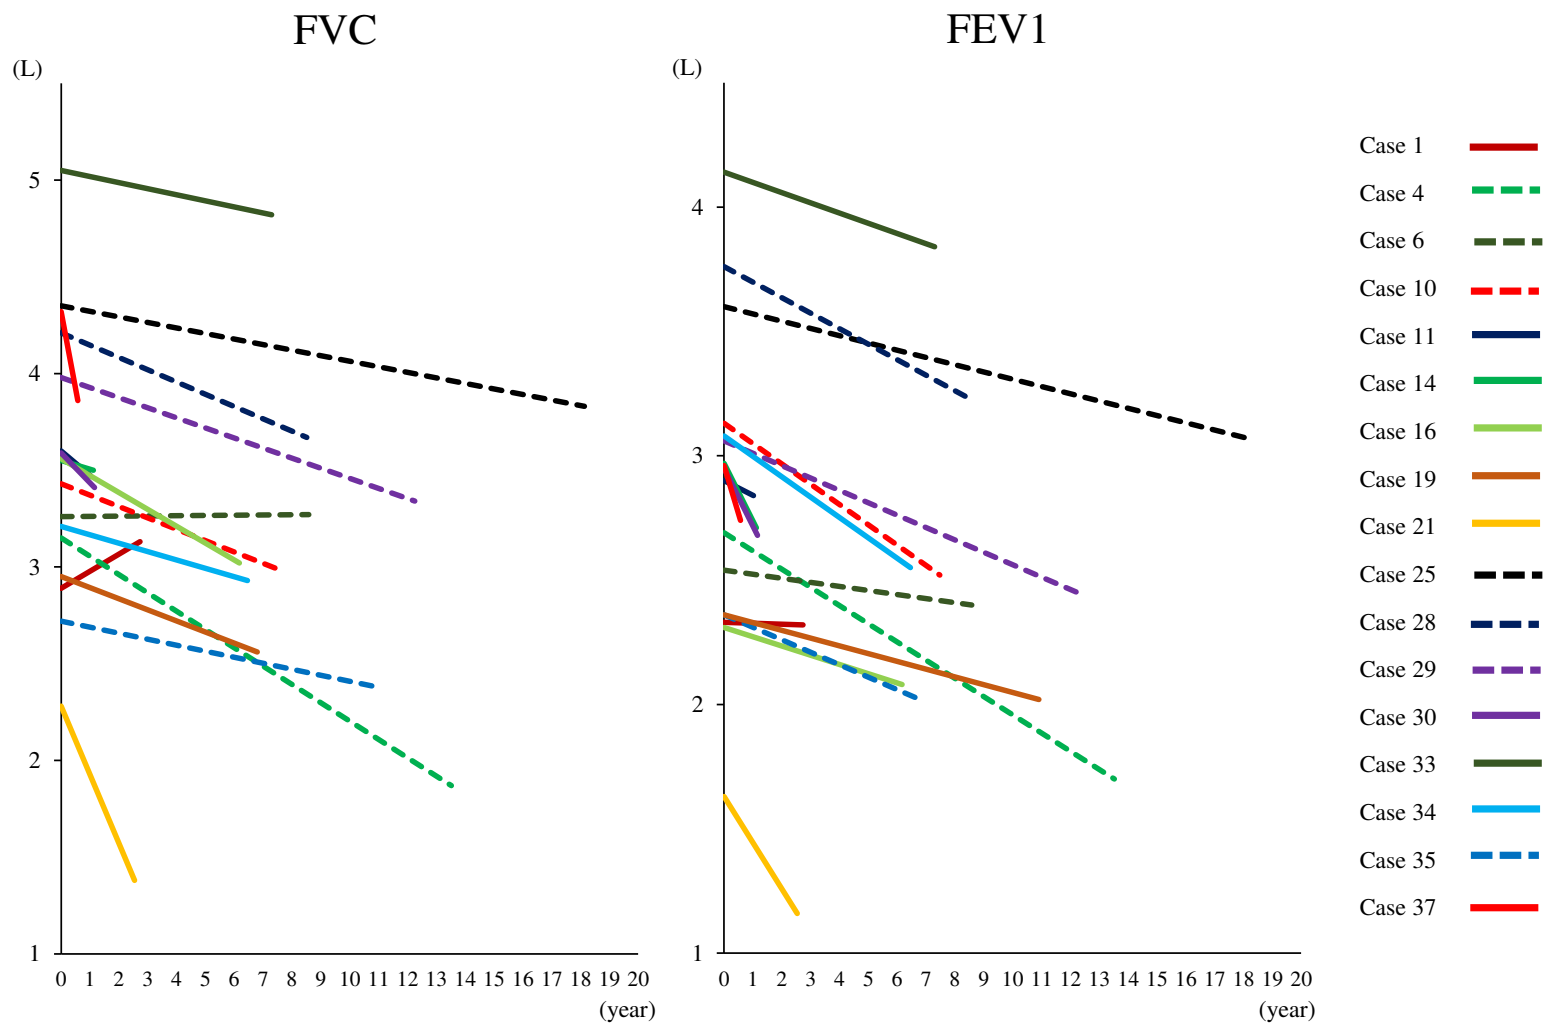

Supplementary Figure 3. Serial changes in pulmonary function tests in patients with IDPO



### Supplementary figures

Supplementary Figure 1. Radiological features of radiological IDPO in chest HRCT

Two radiologists evaluated the HRCT findings of 30 cases of radiological IDPO by using the score sheet (see the Supplementary Table 2). The data of craniocaudal distribution (A) and axial distribution (B) of ossified lesions were examined. Quantitative and qualitative assessments of calcified lesions, interstitial changes, and other findings were performed (C).

Supplementary Figure 2. The representative case showing deterioration of the radiological findings on chest radiography and HRCT

Supplementary Figure 3. Serial changes of pulmonary function tests in patients with IDPO

The PFT data of 17 cases with IDPO were collected at two time points: at the diagnosis and latest follow-up. The changes in FVC (L) and FEV1 (L) were plotted.

# A nationwide epidemiological survey of idiopathic dendriform pulmonary ossification

---

(Primary survey)

**Principal investigator: Yasuhiko Nishioka, M.D., Ph.D.**  
**Professor and Chairman**  
**Department of Respiratory Medicine and Rheumatology**  
**Graduate School of Biomedical Sciences, Tokushima University**

January 4, 2018

**TABLE OF CONTENTS**

|     |                                                      |   |
|-----|------------------------------------------------------|---|
| 1.  | INTRODUCTION AND RATIONALE .....                     | 1 |
| 2.  | OBJECT .....                                         | 1 |
| 3.  | PARTICIPANTS .....                                   | 1 |
| 3-1 | Inclusion criteria .....                             | 1 |
| 3-2 | Exclusion criteria .....                             | 1 |
| 3-3 | Dropout criteria .....                               | 1 |
| 4.  | METHODS .....                                        | 1 |
| 4-1 | Collecting data .....                                | 1 |
| 4-2 | The way to collect and evaluate the data .....       | 1 |
| 4-3 | Period of study .....                                | 2 |
| 4-4 | Data management .....                                | 2 |
| 4-5 | Data transfer .....                                  | 2 |
| 5.  | BURDEN, BENEFIT, AND RISK FOR PARTICIPANTS .....     | 2 |
| 6.  | INFORMED CONSENT .....                               | 2 |
| 6-1 | The way of consent .....                             | 2 |
| 6-2 | The document of consent .....                        | 2 |
| 7.  | PRIVACY PROTECTION .....                             | 2 |
| 8.  | HEALTH DAMAGE COMPENSATION .....                     | 2 |
| 9.  | CHANGES OF STUDY .....                               | 2 |
| 10. | END, DISCONTINUATION AND INTERRUPTION OF STUDY ..... | 2 |
| 11. | HANDLING AND STORAGE OF DATA AND DOCUMENTS .....     | 2 |
| 12. | PUBLIC DISCLOSURE AND PUBLICATION POLICY .....       | 2 |
| 13. | ANNUAL PROGRESS REPORT .....                         | 3 |
| 14. | FUNDING AND CONFLICT OF INTEREST .....               | 3 |
| 15. | REFERENCES .....                                     | 3 |

## 1. INTRODUCTION AND RATIONALE

Pulmonary ossification was pathologically noticed as the condition showing bone formation with or without marrow components appeared in the bilateral lung parenchyma<sup>1</sup>. A first case was reported in 1856 by Luschka<sup>1</sup>. The early representative reports of autopsy cases showed that most were affected by underlying diseases<sup>2, 3</sup>. However, since 1970s, the number of reports for idiopathic cases with diffuse pulmonary ossification have been increased<sup>4-7</sup>. In the 2000s, several case reports have shown idiopathic cases of pulmonary ossification without underlying pulmonary or systemic diseases<sup>6-8</sup>. The information from these reports suggested the quite homogenous clinical features such as male-predominant, asymptomatic and a branching type of ossification in HRCT and/or histology, whereas there is no comprehensive study to analyze the clinical features including onset, pulmonary function, complication, clinical course and prognosis in addition to radiological and histopathological details.

We, the Study Group on Diffuse Pulmonary Disorders, Scientific Research/Research on Intractable Diseases in Japan, here conducted a nationwide study to clarify the clinical findings of idiopathic cases of pulmonary ossification in Japan. Therefore, we used a term of idiopathic pulmonary dendriform ossification (IDPO) in the present study.

## 2. OBJECT

We conducted a nationwide survey in Japan from 2017 to 2019 to understand and clarify the pathophysiology of IDPO. The questionnaire by mail inquired into the number of cases of suspected IDPO to 1,791 hospitals, that have over 200 beds in Japan.

## 3. PARTICIPANTS

### 3-1 Inclusion criteria

Patients with diffuse pulmonary ossification diagnosed pathologically without any underlying disease

### 3-2 Exclusion criteria

- 1) Patients with diffuse pulmonary ossification diagnosed pathologically with any underlying disease as follows;<sup>9)</sup>

- I. Preexisting pulmonary disorder

- A. Idiopathic pulmonary fibrosis
- B. Pulmonary amyloidosis
- C. Chronic busulfan therapy
- D. Acute respiratory distress syndrome
- E. Hamman-Rich syndrome
- F. Sarcoidosis
- G. Histoplasmosis
- H. Tuberculosis
- I. Metastatic breast cancer
- J. Pulmonary metastases of osteogenic sarcoma
- K. Metastatic melanoma

## II. Preexisting cardiac disorder

- A. Mitral stenosis
- B. Chronic left ventricular failure
- C. Idiopathic hypertrophic subaortic stenosis

## III. Preexisting extracardiopulmonary disorder

- A. Primary and secondary hyperparathyroidism
- B. Hypervitaminosis D
- C. Pyloric stenosis with alkalosis

- 2) Patients with other pulmonary diseases except pulmonary ossification

### 3-3 Dropout criteria

Patients to be decided to dropout and cancel by the principal investigator(PI).

## 4. METHODS

### 4-1 Collecting data

The number of cases suspected IDPO in participating institutions. The data does not include personal information of patients.

### 4-2 The way to collect and evaluate the data

The questionnaire by mail.

\*Data

- 1) The number of cases of IDPO by histopathological diagnosis that experienced
- 2) The timing of diagnosis of IDPO
- 3) The number of cases of IDPO diagnosed by only chest CT and no histopathological findings that experienced.
- 4) Whether or not survey cooperation is possible.

We aggregate the results.

### 4-3 Period of study

From the date approved by the institutional ethics committee in Tokushima University to March 31,2019.

### 4-4 Data management

PI stores the answer sheets in lockable shelves. Only this study can use these answers.

### 4-5 Data transfer

Not applicable

## 5. BURDEN, BENEFIT AND RISK FOR PARTICIPANTS

Not applicable

## 6. INFORMED CONSENT

## 6-1 The way of consent

Not applicable

## 6-2 The document of consent

Not applicable

**7. PRIVACY PROTECTION**

The answer sheets are storage in lockable shelves.

**8. HEALTH DAMAGE COMPESATION**

Not applicable

**9. CHANGES OF STUDY**

When this protocol is changed something, principal investigator reports the change to the director of Tokushima university hospital. This study will continue after another approval.

**10. END, DISCONTINUATION AND INTERRUPTION OF STUDY**

When PI terminates or stops this study, he reports it to the director of Tokushima university hospital with documents within three months.

**11. HANDOLING AND STORAGE OF DATA AND DOCUMENTS**

The storage manager, PI handholds and storages all data and documents in lockable shelves for five years from termination of this study.

**12. PUBLIC DISCLOSURE AND PUBLICATION POLICY**

Publication is the responsibility of PI.

**13. ANNUAL PROGRESS REPORT**

PI reports the research status report to the director of Tokushima university hospital each year.

**14. FUNDING AND CONFLICT OF INTEREST**

This work was partly supported by a grant to the Ministry of Health, Labour and Welfare, the Study Group on Diffuse Pulmonary Disorders, Scientific Research/Research on Intractable Diseases in Japan. Clinical Research Conflict of Interest Review Committee in Tokushima university hospital approves conflict of interest of this study.

**15. REFERNCES**

- 1) Luschka H. Verästigte Knochenbildung im Parenchym der Lungen. Virchows Arch 10, 500-505, 1856
- 2) Lara JF, Catropo JF, Kim DU, et al. Dendriform pulmonary ossification, a form of diffuse pulmonary ossification: report of a 26-year autopsy experience. Arch Pathol Lab Med 129, 348-353, 2005

- 3) Tseung J, Duflou J. Diffuse pulmonary ossification: an uncommon incidental autopsy finding. *Pathology* 38, 45-48, 2006
- 4) Martinez JB, Ramos SG. Dendriform pulmonary ossification. *Lancet* 382:222, 2013.
- 5) Azuma A, Miyamoto H, Enomoto T, et al. Familial clustering of dendriform pulmonary ossification. *Sarcoidosis Vasc Diffuse Lung Dis* 20:152-154, 2003.
- 6) Mizushina Y, Bando M, Hosono T, et al. A rare case of asymptomatic diffuse pulmonary ossification detected during a routine health examination. *Intern Med* 51, 2923–2927, 2012
- 7) Kinoshita Y, et al. Familial diffuse pulmonary ossification: a possible genetic disorder. *Respir Investig* 55:79-82, 2017.
- 8) Jamjoom L, Meziane M, Renapurkar RD. Dendriform ossification: report of two cases. *Indian J Radiol Imaging* 23, 15–18, 2013
- 9) Chan ED, Morales DV, Welsh CH, et al. Calcium deposition with or without bone formation in the lung. *Am J Respir Crit Care Med* 165:1654-1669, 2002.

# A nationwide epidemiological survey of idiopathic dendriform pulmonary ossification

---

(Secondary survey)

**Principal investigator: Yasuhiko Nishioka, M.D., Ph.D.**

**Professor and Chairman**

**Department of Respiratory Medicine and Rheumatology**

**Graduate School of Biomedical Sciences, Tokushima University**

July 7, 2018



**TABLE OF CONTENTS**

|     |                                                      |   |
|-----|------------------------------------------------------|---|
| 1.  | INTRODUCTION AND RATIONALE .....                     | 1 |
| 2.  | OBJECT .....                                         | 1 |
| 3.  | PARTICIPANTS .....                                   | 1 |
| 3-1 | Inclusion criteria .....                             | 1 |
| 3-2 | Exclusion criteria .....                             | 1 |
| 3-3 | Dropout criteria .....                               | 1 |
| 4.  | METHODS .....                                        | 1 |
| 4-1 | Collecting data .....                                | 1 |
| 4-2 | Period of study .....                                | 2 |
| 4-3 | Data management .....                                | 2 |
| 4-4 | Data transfer .....                                  | 2 |
| 5.  | BURDEN, BENEFIT AND RISK FOR PARTICIPANTS .....      | 2 |
| 6.  | STATISTICAL ANALYSIS .....                           | 2 |
| 7.  | INFORMED CONSENT .....                               | 2 |
| 7-1 | The way of consent .....                             | 2 |
| 7-2 | The document of consent .....                        | 3 |
| 8.  | PRIVACY PROTECTION .....                             | 3 |
| 9.  | HEALTH DAMAGE COMPENSATION .....                     | 3 |
| 10. | CHANGES OF STUDY .....                               | 3 |
| 11. | END, DISCONTINUATION AND INTERRUPTION OF STUDY ..... | 3 |
| 12. | HANDLING AND STORAGE OF DATA AND DOCUMENTS .....     | 3 |
| 13. | PUBLIC DISCLOSURE AND PUBLICATION POLICY .....       | 3 |
| 14. | ANNUAL PROGRESS REPORT .....                         | 3 |
| 15. | FUNDING AND CONFLICT OF INTEREST .....               | 3 |
| 16. | REFERENCES .....                                     | 3 |

## 1. INTRODUCTION AND RATIONALE

Pulmonary ossification was pathologically noticed as the condition showing bone formation with or without marrow components appeared in the bilateral lung parenchyma<sup>1)</sup>. The first case was reported in 1856 by Luschka<sup>1)</sup>. The early representative reports of autopsy cases showed that most were affected by underlying diseases<sup>2, 3)</sup>. However, since the 1970s, the number of reports of idiopathic cases with diffuse pulmonary ossification have been increasing<sup>4-7)</sup>. In the 2000s, several case reports have reported idiopathic pulmonary ossification without underlying pulmonary or systemic diseases<sup>6-8)</sup>. The information from these reports suggested quite homogenous clinical features such as male-predominance, asymptomatic disease, and branching-type ossification on HRCT and/or histological studies, but there is no comprehensive study that analyzed the clinical features including onset, pulmonary function, complication, clinical course, and prognosis in addition to radiological and histopathological details.

We, the Study Group on Diffuse Pulmonary Disorders, Scientific Research/Research on Intractable Diseases in Japan, conducted a nationwide study to clarify the clinical findings of idiopathic cases of pulmonary ossification in Japan. Therefore, we used the term idiopathic pulmonary dendriform ossification (IDPO) in the present study. The primary survey revealed 50 cases in 32 institutions.

## 2. OBJECT

We collected the data of these cases: clinical feature, examined data of blood and pulmonary function test (PFT), chest radiography and high-resolution CT (HRCT) scans, and pathological specimens. We aimed to reveal the features of IDPO and present diagnostic guidelines for IDPO.

## 3. PARTICIPANTS

### 3-1 Inclusion criteria

Patients with diffuse pulmonary ossification diagnosed pathologically without any underlying disease were included.

### 3-2 Exclusion criteria

3) Patients with diffuse pulmonary ossification diagnosed pathologically with any underlying disease as follows: <sup>9)</sup>

#### I. Preexisting pulmonary disorder

- A. Idiopathic pulmonary fibrosis
- B. Pulmonary amyloidosis
- C. Chronic busulfan therapy
- D. Acute respiratory distress syndrome
- E. Hamman-Rich syndrome
- F. Sarcoidosis
- G. Histoplasmosis
- H. Tuberculosis
- I. Metastatic breast cancer
- J. Pulmonary metastases of osteogenic sarcoma
- K. Metastatic melanoma

#### II. Preexisting cardiac disorder

- A. Mitral stenosis

B. Chronic left ventricular failure

C. Idiopathic hypertrophic subaortic stenosis

III. Preexisting extracardiopulmonary disorder

A. Primary and secondary hyperparathyroidism

B. Hypervitaminosis D

C. Pyloric stenosis with alkalosis

Patients with other pulmonary diseases except pulmonary ossification

### 3-3 Dropout criteria

Patients to be decided as dropouts and cancelled by the principal investigator (PI).

## 4. METHODS

### 4-1 Data collection

#### 4-1-1 Data

The following data at both the diagnosis and latest follow-up were collected (see the data sheet shown in the Supplementary Table 1). All data were already existing and not tested only for this study.

- 1) Background of patients
- 2) Physical findings
- 3) Laboratory data
- 4) Chest image (chest radiography and HRCT)
- 5) Pathological slides

Any identifying data were removed and anonymized. Each institution managed the data using the correspondence table. This study was approved by the ethics committee in each institution for using the patients' data.

#### 4-1-2 The detailed data

- 1) Background of patients  
Sex, date of diagnosis, age at diagnosis, diagnostic opportunity, method of diagnosis, complications, medical history, family history of IDPO, smoking history, occupational history, et al.
- 2) Findings at diagnosis  
Symptoms  
Physical findings (height, body weight, blood pressure, heart rate, lung sounds, SpO<sub>2</sub>, et al.)  
Blood test data (CBC, liver function, renal function, thyroid function, intact PTH, calcitonin, vitamin D, HbA1c, BNP, KL-6, et al.)  
Urinary test data, arterial blood gas analysis, pulmonary function test, electro-cardiogram, echocardiography  
Chest radiography, HRCT  
Transbronchial biopsy, bronchoalveolar lavage, surgical lung biopsy, autopsy
- 3) Findings at the latest follow-up  
Last confirmation date, age, SpO<sub>2</sub>, arterial blood gas analysis, drug therapy, oxygen therapy, recent chest radiography, recent HRCT, recent pulmonary function test, survival

#### 4-1-3 Evaluation of data

The data were aggregated and analyzed clinically, radiologically and histopathologically by specialists of the Study Group on Diffuse Pulmonary Disorders, Scientific Research/Research on Intractable

## Diseases

### 4-2 Period of study

From the date approved by the institutional ethics committee in Tokushima University to March 31, 2022.

### 4-3 Data management

PI will store the answer sheets in lockable shelves. The collected data will be used only for this study.

### 4-4 Data transfer

The questionnaire sheet was sent by mail or via the internet. Chest images were copied on CD-ROM and sent by mail. The pathological slides were sent by mail. All data were anonymized. The principal investigator (PI) stored them in lockable shelves.

## 5. BURDEN, BENEFIT AND RISK FOR PARTICIPANTS

Not applicable for observational study

## 6. STATISTICAL ANALYSIS

Not applicable

## 7. INFORMED CONSENT

### 7-1 The way of consent

By opt-out because all the collected data were already existing and anonymized.

### 7-2 The document of consent

Each institution has the documents for opt-out, following the rules.

## 8. PRIVACY PROTECTION

We protected the privacy of subjects by identifying them with a research subject identification code. When publishing the results of this research, the privacy of the research subjects will be protected as well.

## 9. HEALTH DAMAGE COMPENSATION

Not applicable

## 10. CHANGES OF STUDY

When this protocol is changed, the PI will report the change to the director of Tokushima university hospital. This study will continue after another approval.

## 11. END, DISCONTINUATION AND INTERRUPTION OF STUDY

When the PI terminates or stops this study, he will report it to the director of Tokushima university hospital with documents within 3 months.

## 12. HANDLING AND STORAGE OF DATA AND DOCUMENTS

The storage manager, i.e., the PI, will retain and store all data and documents in lockable shelves for 5 years

from termination of this study.

### 13. PUBLIC DISCLOSURE AND PUBLICATION POLICY

Publication is the responsibility of PI.

### 14. ANNUAL PROGRESS REPORT

PI will report the research status to the director of Tokushima university hospital each year.

### 15. FUNDING AND CONFLICT OF INTEREST

This work was partly supported by a grant to the Ministry of Health, Labour and Welfare, the Study Group on Diffuse Pulmonary Disorders, Scientific Research/Research on Intractable Diseases in Japan. The Clinical Research Conflict of Interest Review Committee in Tokushima university hospital approved the conflict of interest of this study.

### 16. REFERENCES

- 10) Luschka H. Verästigte Knochenbildung im Parenchym der Lungen. *Virchows Arch* 10, 500-505, 1856
- 11) Lara JF, Catroppo JF, Kim DU, et al. Dendriform pulmonary ossification, a form of diffuse pulmonary ossification: report of a 26-year autopsy experience. *Arch Pathol Lab Med* 129, 348-353, 2005
- 12) Tseung J, Duflou J. Diffuse pulmonary ossification: an uncommon incidental autopsy finding. *Pathology* 38, 45-48, 2006
- 13) Martinez JB, Ramos SG. Dendriform pulmonary ossification. *Lancet* 382:222, 2013.
- 14) Azuma A, Miyamoto H, Enomoto T, et al. Familial clustering of dendriform pulmonary ossification. *Sarcoidosis Vasc Diffuse Lung Dis* 20:152-154, 2003.
- 15) Mizushina Y, Bando M, Hosono T, et al. A rare case of asymptomatic diffuse pulmonary ossification detected during a routine health examination. *Intern Med* 51, 2923–2927, 2012
- 16) Kinoshita Y, et al. Familial diffuse pulmonary ossification: a possible genetic disorder. *Respir Investig* 55:79-82, 2017.
- 17) Jamjoom L, Meziane M, Renapurkar RD. Dendriform ossification: report of two cases. *Indian J Radiol Imaging* 23, 15–18, 2013
- 18) Chan ED, Morales DV, Welsh CH, et al. Calcium deposition with or without bone formation in the lung. *Am J Respir Crit Care Med* 165:1654-1669, 2002.
